# Supplementary material
Source: MDPI journal article supplement (https://www.mdpi.com/1999-4907/13/2/273)
Supplement: s1 [file s1]

# Supplementary Table S1

Table S1. Questionnaire of the survey carried out in the frame of the FP-1403 NNEXT Cost Action (Non-native tree species for European forests: experiences, risks and opportunities) and its Working Group 2 - 'Pathways' on a) non-native tree species established field trials and b) the existing official or non-official recommendations for planting of their FRM in the participating countries.

| PART A - GENETIC TRIALS                                                                        |                        |                          |                     |
|------------------------------------------------------------------------------------------------|------------------------|--------------------------|---------------------|
| Country:                                                                                       |                        |                          |                     |
| Non native tree species:                                                                       |                        |                          |                     |
| Genetic test - Local name/Number :                                                             |                        |                          |                     |
| Type of genetic trial                                                                          | Provenance             | Clonal                   | Family/Progeny test |
|                                                                                                |                        |                          |                     |
| Location of the genetic trial                                                                  | Longitude              | Latitude                 | Altitude            |
|                                                                                                |                        |                          |                     |
| Year of Establishment:                                                                         |                        |                          |                     |
| Type of genetic trial                                                                          | IUFRO                  | Internat.                | National            |
|                                                                                                |                        |                          |                     |
| Number of provenances tested:                                                                  |                        |                          |                     |
| Data of tested provenances/origins (IUFRO origin no, coordinates of origin of tested material) |                        |                          |                     |
| Tested genetic material                                                                        | FRM produced in Europe | Introduced to Europe FRM |                     |
| IUFRO seed source No:                                                                          |                        |                          |                     |
| Latitude of origin :                                                                           |                        |                          |                     |
| Longitude of origin:                                                                           |                        |                          |                     |
| Altitude of origin:                                                                            |                        |                          |                     |

|                                                     |
|-----------------------------------------------------|
| <b>Important Results:</b>                           |
| <br><br><br><br><br>                                |
| <b>References (if results have been published):</b> |
| 1.                                                  |
| 2.                                                  |
| 3.                                                  |
| 4.                                                  |
|                                                     |
|                                                     |

| PART B: PROVENANCE RECOMMENDATIONS                  |                                                                                                                                    |     |    |          |
|-----------------------------------------------------|------------------------------------------------------------------------------------------------------------------------------------|-----|----|----------|
| Country:                                            |                                                                                                                                    |     |    |          |
| Non native tree species:                            |                                                                                                                                    |     |    |          |
|                                                     | Do official provenance recommendations for this species exist?                                                                     | Yes | No | Comments |
| Official recommendations                            | If yes, please describe these recommendations.:                                                                                    |     |    |          |
|                                                     | A) Are the recommendation specific for certain provenances                                                                         |     |    |          |
|                                                     | B) Or for provenances from specific seed zones                                                                                     |     |    |          |
|                                                     | C) Or for provenances from specific countries                                                                                      |     |    |          |
|                                                     | Are the provenance recommendations mandatory for the use of FRM of this species (i.e. do they have to follow the recommendations): |     |    |          |
|                                                     | A) Mandatory                                                                                                                       |     |    |          |
|                                                     | B) Voluntary                                                                                                                       |     |    |          |
|                                                     | Are the provenance recommendations based on previous genetic tests?                                                                |     |    |          |
|                                                     | A) On provenance trials with tree ages > 10 years                                                                                  |     |    |          |
|                                                     | B) On seedling tests with ages < 10 years                                                                                          |     |    |          |
|                                                     | C) On climate comparisons                                                                                                          |     |    |          |
|                                                     | D) On tests within neighbouring countries                                                                                          |     |    |          |
|                                                     | Please specify the recommendations (provenance, seed zones or country of origin):                                                  |     |    |          |
|                                                     | Recommendation 1                                                                                                                   |     |    |          |
|                                                     | Recommendation 2                                                                                                                   |     |    |          |
|                                                     | .....                                                                                                                              |     |    |          |
|                                                     | Please provide reference to the recommendations if references exist (can be in national language)                                  |     |    |          |
|                                                     | Reference 1                                                                                                                        |     |    |          |
| Reference 2                                         |                                                                                                                                    |     |    |          |
| .....                                               |                                                                                                                                    |     |    |          |
| Unofficial recommendations (i.e. from publications) | Do unofficial provenance recommendations for this species exist in publications?                                                   | Yes | No | Comments |
|                                                     | If yes, please describe these recommendations.:                                                                                    |     |    |          |
|                                                     | A) Are the recommendation specific for certain provenances                                                                         |     |    |          |
|                                                     | B) Or for provenances from specific seed zones                                                                                     |     |    |          |
|                                                     | C) Or for provenances from specific countries                                                                                      |     |    |          |
|                                                     | Are the provenance recommendations based on previous genetic tests?                                                                |     |    |          |
|                                                     | A) On provenance trials with tree ages > 10 years                                                                                  |     |    |          |
|                                                     | B) On seedling tests with ages < 10 years                                                                                          |     |    |          |
|                                                     | C) On climate comparisons                                                                                                          |     |    |          |
|                                                     | D) On tests within neighbouring countries                                                                                          |     |    |          |
|                                                     | Please specify the recommendations (provenance, seed zones or country of origin):                                                  |     |    |          |
|                                                     | Recommendation 1                                                                                                                   |     |    |          |
| Recommendation 2                                    |                                                                                                                                    |     |    |          |

|  |                                                                                                          |
|--|----------------------------------------------------------------------------------------------------------|
|  | .....                                                                                                    |
|  | <b>Please provide reference to the recommendations if references exist (can be in national language)</b> |
|  | Reference 1                                                                                              |
|  | Reference 2                                                                                              |
|  | .....                                                                                                    |
